# Supplementary material for: Effektives Steuern von IT-Outsourcingdienstleistern
Source: Springer Nature journal article supplement (doi:10.1007/s11576-012-0336-0), 2012-09-12
Supplement: 11576_2012_336_MOESM1_ESM.pdf [file 11576_2012_336_MOESM1_ESM.pdf]

# **Effektives Steuern von IT-Outsourcingdienstleistern – Entwicklung und Überprüfung eines Referenzmodells für Steuerungsprozesse im IT-Outsourcing**

**Nils Urbach, Tobias Würz**

WIRTSCHAFTSINFORMATIK (2012) 54(5)

**Anhang (verfügbar online über <http://springerlink.com>)**

## Anhang A: IT Outsourcing Success and Failure

| <b>Customer</b> | <b>Vendor</b>   | <b>Service</b>                            | <b>Success / Failure</b>        | <b>Reference</b>                |
|-----------------|-----------------|-------------------------------------------|---------------------------------|---------------------------------|
| BNP Paribas     | IBM             | IT infrastructure                         | Success (contract prolongation) | IBM (2011)                      |
| Deutsche Post   | Hewlett Packard | IT infrastructure                         | Failure (exit)                  | Computerwoche (2008)            |
| Karstadt-Quelle | Atos Origin     | IT infrastructure                         | Failure (exit)                  | Computerwoche (2006)            |
| KPT             | T-Systems       | IT infrastructure and application support | Success (contract prolongation) | T-Systems (2011)                |
| Neckermann      | Atos Origin     | IT infrastructure                         | Success (contract prolongation) | Atos (2011)                     |
| Nord/LB         | IBM             | IT infrastructure                         | Success (contract prolongation) | CIO (2008)                      |
| Philips         | Dell            | IT infrastructure                         | Failure (exit)                  | Computer Business Review (2006) |
| Tamedia         | Swisscom        | IT infrastructure                         | Failure (exit)                  | inside-it.ch (2011)             |
| WestLB          | T-Systems       | IT infrastructure                         | Failure (exit)                  | Computerwoche (2011)            |
| Zumtobel        | Atos Origin     | IT infrastructure and application support | Success (contract prolongation) | Computerwoche (2009)            |

## Anhang B: Steering Mechanisms in Literature

| References                  | Contract Management                                   | Risk Management                                    | Performance Management                                                                      | Communications Management                                                                                                             | Demand Management                                                 | Service Improvement                              |
|-----------------------------|-------------------------------------------------------|----------------------------------------------------|---------------------------------------------------------------------------------------------|---------------------------------------------------------------------------------------------------------------------------------------|-------------------------------------------------------------------|--------------------------------------------------|
| Aubert et al. (1999)        |                                                       | Risk management                                    |                                                                                             |                                                                                                                                       |                                                                   |                                                  |
| Beulen and Ribbers (2002)   | Contract- and account management (CAM)                |                                                    |                                                                                             | Communication structure, information management                                                                                       |                                                                   |                                                  |
| Chapman and Ward (1996)     |                                                       | Risk management                                    |                                                                                             |                                                                                                                                       |                                                                   |                                                  |
| Currie and Willcocks (1998) | Commissioning and managing IT outsourcing contracts   |                                                    |                                                                                             |                                                                                                                                       |                                                                   |                                                  |
| DIN (2010)                  |                                                       | Risk analysis of services                          | Performance measurement and monitoring of service provision                                 |                                                                                                                                       | Requirements/ service catalogue, demand/ change management        | Monitoring of regular operations                 |
| Gewald and Helbig (2006)    | Contract management                                   | Strategic risk management, risk management process |                                                                                             | Communication of goals and collaborative behavior expectations, joint operational meetings, report or escalate to strategic committee | Translate business initiatives into projects                      |                                                  |
| Goles and Chin (2005)       |                                                       |                                                    |                                                                                             | Communication, conflict resolution                                                                                                    |                                                                   |                                                  |
| Goo et al. (2009)           |                                                       |                                                    | Service level management                                                                    |                                                                                                                                       |                                                                   |                                                  |
| Hefley and Loesche (2006)   | Establishing well-defined contracts with stakeholders | Managing risks effectively                         | Monitoring and controlling activities to consistently meet the service delivery commitments | Communicating effectively with all stakeholders                                                                                       | Translating implicit and explicit needs into defined requirements | Continual improvement of process and performance |
| Hodel et al. (2004)         |                                                       | Risk management                                    | Controlling of operations                                                                   | Definition of committees                                                                                                              | Requirements management                                           |                                                  |
| ITGI (2005)                 | Contract management                                   |                                                    | Performance management                                                                      |                                                                                                                                       |                                                                   |                                                  |

|                           |                                                        |  |                                                                            |                                                                                               |  |                                             |
|---------------------------|--------------------------------------------------------|--|----------------------------------------------------------------------------|-----------------------------------------------------------------------------------------------|--|---------------------------------------------|
| Kern and Willcocks (2000) | Contract facilitation, contract monitoring             |  | Service performance reports, service level agreement                       |                                                                                               |  |                                             |
| McFarlan and Nolan (1995) | Partnership/ contract management                       |  | Performance management                                                     | Customer-outsourcer interface                                                                 |  |                                             |
| Miranda and Kavan (2005)  |                                                        |  | Control processes                                                          |                                                                                               |  | Benchmarks for performance and compensation |
| Quinn (1999)              | Developing a procurement and contract management group |  | Actively measuring the benefits intended from the outsourcing relationship | Developing detailed knowledge-based operations data systems, creating a mutual contact system |  |                                             |

## **Anhang C: Interviewleitfaden**

*[Präsentation des Rahmenwerks und Erklärung der verschiedenen Mechanismen und Prozesse]*

### **Verständlichkeit**

1. Welche Elemente des Rahmenwerks sind unklar und bedürfen weiterer Erläuterung?
2. In welcher Weise können wir Struktur und Darstellung des Rahmenwerks verbessern?
3. Inwiefern sind aus Ihrer Sicht die Inhalte des Rahmenwerks für Jemanden mit geringem Wissen und geringer Erfahrung im Bereich IT-Outsourcing verständlich?

### **Vollständigkeit**

4. Inwieweit deckt das Rahmenwerk aus Ihrer Perspektive die wichtigsten Mechanismen einer IT-Outsourcing-Steuerung ab?
5. Sollten weitere Mechanismen oder Prozesse zum Rahmenwerk hinzugefügt werden?
6. Sehen Sie weitere Kontextfaktoren, die einen signifikanten Einfluss auf die Steuerung von IT-Outsourcing haben und die bei der Implementierung des Rahmenwerks berücksichtigt werden sollten?

### **Operationalisierbarkeit**

7. Welche Hürden sehen Sie bei der Implementierung des Rahmenwerks in der Unternehmenspraxis?
8. Welche Probleme erwarten Sie bei der Operationalisierung der Prozesse des Rahmenwerks?
9. Wie können wir die Anwendbarkeit des Rahmenwerks in der Praxis verbessern?

### **Akzeptanz**

10. Inwieweit stellt das Rahmenwerk aus Ihrer Perspektive ein wertvolles Instrument für die IT-Outsourcing-Steuerung dar?
11. Wie ist Ihre Gesamtbewertung des entwickelten Rahmenwerks?
12. Welche spezifischen Verbesserungspotenziale sehen Sie?

## Anhang D: Questionnaire (Excerpt)

Please note that sub-process and process descriptions included in the questionnaire presented below are not identical to those of the reference framework's final version, since the questionnaire was applied in the course of the evaluation phase and revised afterwards.

### Main Process 1: Demand Management

#### Process Description

**Demand Management** is the continuous process of identifying, analyzing, prioritizing, and implementing quantitative changes (e.g., additional server) and qualitative changes (e.g., new type of server, new services, and non-standard-services).

Demand Management subsumes three sub-processes:

1. **Service Catalogue Maintenance:** Continuous development of the catalogue of standard services (SSR)
2. **Order Process for SSR and NSSR:** Coordination of the decentralized process for ordering standard services (SSR) and requesting for non-standard services (NSSR)
3. **Process Consulting, Prioritization & Implementation Tracking of Non-standard Services:** Identification of technical change needs to optimize business processes, realization of IT governance through quick and transparent requirements prioritization, coordination between business and contractor, as well as technical controlling of change-request implementation

#### (1.1) Service Catalogue Maintenance

Please enter your assessment of this process.

| Maturity*                                                                                                                                                                                                                                                                                                                                                                                                                                                                | Importance                                                                                                                                                                                                                                                                                                                                                                                                                                                                                  | Urgency                                                                                                                                                                                                                                                                                                                                                                                                                                                                             | Responsibility                                                                                                                                                                                                                                                                                                                                                                                                               |
|--------------------------------------------------------------------------------------------------------------------------------------------------------------------------------------------------------------------------------------------------------------------------------------------------------------------------------------------------------------------------------------------------------------------------------------------------------------------------|---------------------------------------------------------------------------------------------------------------------------------------------------------------------------------------------------------------------------------------------------------------------------------------------------------------------------------------------------------------------------------------------------------------------------------------------------------------------------------------------|-------------------------------------------------------------------------------------------------------------------------------------------------------------------------------------------------------------------------------------------------------------------------------------------------------------------------------------------------------------------------------------------------------------------------------------------------------------------------------------|------------------------------------------------------------------------------------------------------------------------------------------------------------------------------------------------------------------------------------------------------------------------------------------------------------------------------------------------------------------------------------------------------------------------------|
| <div style="border: 1px solid black; padding: 5px;"> <div style="text-align: right; font-size: small;">Please choose. ↓</div> <div style="font-size: x-small; padding: 2px;">Please choose.</div> <div style="font-size: x-small; padding: 2px;">Ad hoc / Unclear</div> <div style="font-size: x-small; padding: 2px;">Defined</div> <div style="font-size: x-small; padding: 2px;">Communicated</div> <div style="font-size: x-small; padding: 2px;">Lived</div> </div> | <div style="border: 1px solid black; padding: 5px;"> <div style="text-align: right; font-size: small;">Please choose. ↓</div> <div style="font-size: x-small; padding: 2px;">Please choose.</div> <div style="font-size: x-small; padding: 2px;">No importance</div> <div style="font-size: x-small; padding: 2px;">Low importance</div> <div style="font-size: x-small; padding: 2px;">Medium importance</div> <div style="font-size: x-small; padding: 2px;">High importance</div> </div> | <div style="border: 1px solid black; padding: 5px;"> <div style="text-align: right; font-size: small;">Please choose. ↓</div> <div style="font-size: x-small; padding: 2px;">Please choose.</div> <div style="font-size: x-small; padding: 2px;">No priority</div> <div style="font-size: x-small; padding: 2px;">Low priority</div> <div style="font-size: x-small; padding: 2px;">Medium priority</div> <div style="font-size: x-small; padding: 2px;">High priority</div> </div> | <div style="border: 1px solid black; padding: 5px;"> <div style="text-align: right; font-size: small;">Please choose. ↓</div> <div style="font-size: x-small; padding: 2px;">Please choose.</div> <div style="font-size: x-small; padding: 2px;">Corporate IT</div> <div style="font-size: x-small; padding: 2px;">Business Unit IT</div> <div style="font-size: x-small; padding: 2px;">Federal (Corp. and BU)</div> </div> |

\*Description:

- Ad hoc / Unclear: The process is not known; if necessary, someone will be called who might be able to help.
- Defined: The process is defined, but how the process should actually flow is not known to me.
- Communicated: I know the process flow as well as my responsibilities in the process and I am enabled to execute my process steps.
- Lived: We have executed the process and it fulfills our requirements.

**Do you see improvement potentials? Do you have specific requirements?**
